# Supplementary material
Source: HighWire-hosted journal article supplement (https://bmjopen.bmj.com/content/10/6/e034380)
Supplement: inline-supplementary-material-3 [file inline-supplementary-material-3.pdf]

1 **Supplementary File 3: Organizational Readiness for Implementing Change (ORIC) – German**  
 2 **version**  
 3  
 4

5 Bitte geben Sie an, wie sehr Sie den folgenden Aussagen zur Umsetzung von partizipativer  
 6 Entscheidungsfindung an Ihrem aktuellen Arbeitsplatz zustimmen. Falls partizipative  
 7 Entscheidungsfindung aktuell nicht umgesetzt wird, wie wäre es im Falle der Umsetzung?  
 8  
 9

|    |                                                                                                                                                                       | stimme<br>nicht<br>zu    | stimme<br>eher<br>nicht<br>zu | teils<br>teils           | stimme<br>eher<br>zu     | stimme<br>zu             |
|----|-----------------------------------------------------------------------------------------------------------------------------------------------------------------------|--------------------------|-------------------------------|--------------------------|--------------------------|--------------------------|
| 1  | Personen, die hier arbeiten, zeigen hohes Engagement bei der Umsetzung von partizipativer Entscheidungsfindung.                                                       | <input type="checkbox"/> | <input type="checkbox"/>      | <input type="checkbox"/> | <input type="checkbox"/> | <input type="checkbox"/> |
| 2  | Personen, die hier arbeiten, werden tun, was auch immer nötig ist, um partizipative Entscheidungsfindung umzusetzen.                                                  | <input type="checkbox"/> | <input type="checkbox"/>      | <input type="checkbox"/> | <input type="checkbox"/> | <input type="checkbox"/> |
| 3  | Personen, die hier arbeiten, wollen partizipative Entscheidungsfindung umsetzen.                                                                                      | <input type="checkbox"/> | <input type="checkbox"/>      | <input type="checkbox"/> | <input type="checkbox"/> | <input type="checkbox"/> |
| 4  | Personen, die hier arbeiten, sind fest entschlossen, partizipative Entscheidungsfindung umzusetzen.                                                                   | <input type="checkbox"/> | <input type="checkbox"/>      | <input type="checkbox"/> | <input type="checkbox"/> | <input type="checkbox"/> |
| 5  | Personen, die hier arbeiten, sind motiviert, partizipative Entscheidungsfindung umzusetzen.                                                                           | <input type="checkbox"/> | <input type="checkbox"/>      | <input type="checkbox"/> | <input type="checkbox"/> | <input type="checkbox"/> |
| 6  | Eventuell entstehen bei der Umsetzung von partizipativer Entscheidungsfindung Herausforderungen. Personen, die hier arbeiten, sind zuversichtlich, diese zu meistern. | <input type="checkbox"/> | <input type="checkbox"/>      | <input type="checkbox"/> | <input type="checkbox"/> | <input type="checkbox"/> |
| 7  | Personen, die hier arbeiten, sind zuversichtlich, dass sie den Verlauf der Umsetzung von partizipativer Entscheidungsfindung überblicken können.                      | <input type="checkbox"/> | <input type="checkbox"/>      | <input type="checkbox"/> | <input type="checkbox"/> | <input type="checkbox"/> |
| 8  | Personen, die hier arbeiten, sind zuversichtlich, dass sie Aufgaben so koordinieren können, dass die Umsetzung reibungslos abläuft.                                   | <input type="checkbox"/> | <input type="checkbox"/>      | <input type="checkbox"/> | <input type="checkbox"/> | <input type="checkbox"/> |
| 9  | Personen, die hier arbeiten, sind zuversichtlich, dass die Klinik sie dabei unterstützen kann, partizipative Entscheidungsfindung umzusetzen.                         | <input type="checkbox"/> | <input type="checkbox"/>      | <input type="checkbox"/> | <input type="checkbox"/> | <input type="checkbox"/> |
| 10 | Personen, die hier arbeiten, sind zuversichtlich, Machenschaften bei der Umsetzung von partizipativer Entscheidungsfindung bewältigen zu können.                      | <input type="checkbox"/> | <input type="checkbox"/>      | <input type="checkbox"/> | <input type="checkbox"/> | <input type="checkbox"/> |

10

1
